# Supplementary material
Source: PubMed Central journal article supplement (PMC3994884)
Supplement: NIHMS559015-supplement-Supplemental_data.pdf [file NIHMS559015-supplement-Supplemental_data.pdf]

# Supplementary Material

## Metabolic Evidence of Diminished Lipid Oxidation in Women With Polycystic Ovary Syndrome

Leah D. Whigham<sup>1, #</sup>, Daniel E. Butcher<sup>2, #</sup>, Hesam Dashti<sup>3</sup>, Marco Tonelli<sup>3</sup>, LuAnn K. Johnson<sup>1</sup>, Mark E. Cook<sup>2</sup>, Warren P. Porter<sup>4</sup>, Hamid Eghbalnia<sup>5</sup>, John L. Kirkley<sup>3, 6</sup>, Steven R. Lindheim<sup>7</sup>, Dale A. Schoeller<sup>8</sup>, David H. Abbott<sup>9</sup>, Fariba M. Assadi-Porter<sup>3, 6</sup>\*

<sup>1</sup>Paso del Norte Institute for Healthy Living, 500 W. University Ave, El Paso, TX 79968, USA; <sup>2</sup>Animal Sciences Department, UW-Madison, 1675 Observatory Drive, Madison, WI 53706, USA; <sup>3</sup>National Magnetic Resonance Facility at Madison, UW-Madison, 433 Babcock Drive, Madison WI 53706, USA; <sup>4</sup>Department of Zoology, UW-Madison, 1117 W. Johnson St. Madison, WI 53706, USA; <sup>5</sup>Department of Molecular and Cellular Physiology, University of Cincinnati, 231 Albert B. Sabin Way, Cincinnati, OH 45267-0576, USA; <sup>6</sup>Department of Biochemistry, UW-Madison, 433 Babcock Drive, Madison WI 53706, USA; <sup>7</sup>Arizona Reproductive Institute 1775 E Skyline Drive, Tucson, AZ 85718, USA; <sup>8</sup>Department of Nutritional Sciences, UW-Madison, 1415 Linden Drive, Madison, WI 53706, USA; <sup>9</sup>Department of Obstetrics and Gynecology and Wisconsin National Primate Research Center, UW-Madison, 1223 Capitol Court, Madison, WI 53715, USA

Supplementary Table 1. Mean and standard error of the mean (SEM) for normal and PCOS women before and after a 2-hour oral glucose tolerance test.

| Average       | 2-Amino-butyrate | 2-Hydroxy-butyrate | 2-Hydroxy-isovalerate | 2-Oxo-caprate | 2-Oxo-isocaproate | 3-Hydroxy-butyrate | 3-Methyl-2-oxo-valerate | Acetate | Aceto-acetate | Acetone | Alanine | Asparagine | Betaine | Citrate | Creatine | Creatinine | DSS (Chemical Shape Indicator) | Dimethyl-amine | Formate | Fructose | Glucose |
|---------------|------------------|--------------------|-----------------------|---------------|-------------------|--------------------|-------------------------|---------|---------------|---------|---------|------------|---------|---------|----------|------------|--------------------------------|----------------|---------|----------|---------|
| Normal Fasted | 0.009            | 0.020              | 0.004                 | 0.002         | 0.014             | 0.050              | 0.010                   | 0.066   | 0.005         | 0.001   | 0.217   | 0.050      | 0.044   | 0.007   | 0.030    | 0.051      | 1.000                          | 0.004          | 0.068   | 0.267    | 2.125   |
| Normal 2hOGTT | 0.012            | 0.015              | 0.004                 | 0.003         | 0.009             | 0.007              | 0.006                   | 0.069   | 0.003         | 0.001   | 0.233   | 0.043      | 0.048   | 0.009   | 0.032    | 0.047      | 1.001                          | 0.003          | 0.074   | 0.243    | 1.932   |
| PCOS Fasted   | 0.018            | 0.029              | 0.006                 | 0.005         | 0.017             | 0.068              | 0.015                   | 0.127   | 0.014         | 0.001   | 0.401   | 0.079      | 0.051   | 0.033   | 0.058    | 0.072      | 1.000                          | 0.004          | 0.087   | 0.471    | 4.299   |
| PCOS 2hOGTT   | 0.014            | 0.017              | 0.006                 | 0.004         | 0.011             | 0.010              | 0.010                   | 0.108   | 0.009         | 0.001   | 0.370   | 0.060      | 0.056   | 0.033   | 0.058    | 0.072      | 1.000                          | 0.003          | 0.086   | 0.534    | 4.713   |
| SEM           |                  |                    |                       |               |                   |                    |                         |         |               |         |         |            |         |         |          |            |                                |                |         |          |         |
| Normal Fasted | 0.003            | 0.002              | 0.001                 | 0.001         | 0.001             | 0.018              | 0.001                   | 0.003   | 0.002         | 0.000   | 0.012   | 0.003      | 0.003   | 0.002   | 0.004    | 0.004      | 0.000                          | 0.001          | 0.005   | 0.010    | 0.030   |
| Normal 2hOGTT | 0.002            | 0.001              | 0.001                 | 0.001         | 0.001             | 0.001              | 0.001                   | 0.002   | 0.001         | 0.000   | 0.011   | 0.002      | 0.004   | 0.002   | 0.005    | 0.002      | 0.000                          | 0.001          | 0.004   | 0.031    | 0.076   |
| PCOS Fasted   | 0.003            | 0.008              | 0.002                 | 0.003         | 0.003             | 0.019              | 0.003                   | 0.027   | 0.004         | 0.000   | 0.084   | 0.015      | 0.009   | 0.002   | 0.015    | 0.013      | 0.000                          | 0.001          | 0.008   | 0.097    | 1.071   |
| PCOS 2hOGTT   | 0.002            | 0.003              | 0.002                 | 0.002         | 0.001             | 0.002              | 0.002                   | 0.019   | 0.003         | 0.000   | 0.066   | 0.009      | 0.009   | 0.001   | 0.015    | 0.014      | 0.000                          | 0.001          | 0.004   | 0.125    | 1.350   |

  

| Average       | Glutamate | Glutamine | Glycerol | Homo-seine | Isobutyrate | Isoleucine | Lactate | Leucine | Lysine | Mannose | Methionine | Ornithine | Phenyl-alanine | Proline | Propionat-e | Pyruvate | Sarcosine | Taurine | Threonine | Tryptophan | Tyrosine | Valine |
|---------------|-----------|-----------|----------|------------|-------------|------------|---------|---------|--------|---------|------------|-----------|----------------|---------|-------------|----------|-----------|---------|-----------|------------|----------|--------|
| Normal Fasted | 0.086     | 0.282     | 1.887    | 0.029      | 0.005       | 0.034      | 0.951   | 0.054   | 0.081  | 0.090   | 0.021      | 0.035     | 0.049          | 0.109   | 0.009       | 0.033    | 0.001     | 0.050   | 0.106     | 0.031      | 0.042    | 0.110  |
| Normal 2hOGTT | 0.077     | 0.245     | 1.961    | 0.021      | 0.004       | 0.020      | 1.274   | 0.034   | 0.069  | 0.019   | 0.015      | 0.028     | 0.040          | 0.097   | 0.005       | 0.006    | 0.001     | 0.052   | 0.085     | 0.026      | 0.030    | 0.086  |
| PCOS Fasted   | 0.125     | 0.353     | 1.027    | 0.111      | 0.008       | 0.055      | 1.803   | 0.080   | 0.130  | 0.070   | 0.031      | 0.052     | 0.062          | 0.200   | 0.015       | 0.010    | 0.002     | 0.092   | 0.202     | 0.045      | 0.077    | 0.161  |
| PCOS 2hOGTT   | 0.103     | 0.320     | 1.235    | 0.044      | 0.007       | 0.031      | 1.681   | 0.052   | 0.111  | 0.044   | 0.021      | 0.051     | 0.048          | 0.191   | 0.011       | 0.009    | 0.001     | 0.069   | 0.156     | 0.040      | 0.057    | 0.127  |
| SEM           |           |           |          |            |             |            |         |         |        |         |            |           |                |         |             |          |           |         |           |            |          |        |
| Normal Fasted | 0.005     | 0.014     | 0.498    | 0.014      | 0.001       | 0.002      | 0.061   | 0.002   | 0.003  | 0.004   | 0.001      | 0.004     | 0.002          | 0.007   | 0.002       | 0.001    | 0.000     | 0.010   | 0.006     | 0.001      | 0.003    | 0.006  |
| Normal 2hOGTT | 0.005     | 0.013     | 0.609    | 0.012      | 0.000       | 0.001      | 0.113   | 0.001   | 0.004  | 0.003   | 0.001      | 0.004     | 0.002          | 0.007   | 0.001       | 0.001    | 0.000     | 0.003   | 0.005     | 0.001      | 0.002    | 0.004  |
| PCOS Fasted   | 0.018     | 0.035     | 0.304    | 0.045      | 0.001       | 0.011      | 0.440   | 0.014   | 0.023  | 0.017   | 0.005      | 0.018     | 0.010          | 0.049   | 0.005       | 0.004    | 0.000     | 0.025   | 0.049     | 0.008      | 0.018    | 0.031  |
| PCOS 2hOGTT   | 0.013     | 0.028     | 0.307    | 0.038      | 0.001       | 0.006      | 0.288   | 0.009   | 0.019  | 0.011   | 0.003      | 0.010     | 0.007          | 0.046   | 0.004       | 0.003    | 0.000     | 0.018   | 0.034     | 0.007      | 0.015    | 0.023  |

**Supplementary Table 2. Metabolites with different responses to glucose perturbation.** The mean concentrations of these metabolites in each group at fasting and 2hOGTT are shown along with their corresponding SEM. The fold changes columns show the direction of changes from the fasting to 2hOGTT; Equation 1 was used to calculate the fold changes. The fold changes in normal women indicate increasing concentration changes in these metabolites after the 2hOGTT challenge. In contrast, in PCOS women the fold changes after 2hOGTT challenge decrease, meaning the response in these metabolites to oral glucose is opposite in PCOS and normal subjects.

| Metabolite     | Concentration (mM) +/- SEM |                        | Normal Fold Changes | Concentration +/- SEM  |                        | PCOS Fold Changes |
|----------------|----------------------------|------------------------|---------------------|------------------------|------------------------|-------------------|
|                | Normal (fasting)           | Normal (2h)            |                     | PCOS (fasting)         | PCOS (2h)              |                   |
| 2-Aminobutrate | 0.01792<br>+/- 0.00473     | 0.02376<br>+/- 0.00354 | 0.3260              | 0.03614<br>+/- 0.00630 | 0.02732<br>+/- 0.00398 | -0.2441           |
| 2-Oxocaporate  | 0.00434<br>+/- 0.00161     | 0.00595<br>+/- 0.00141 | 0.3712              | 0.01097<br>+/- 0.00533 | 0.00892<br>+/- 0.00452 | -0.1870           |
| Acetate        | 0.13160<br>+/- 0.00486     | 0.13886<br>+/- 0.00419 | 0.0551              | 0.25387<br>+/- 0.04985 | 0.21599<br>+/- 0.03470 | -0.1492           |
| Acetone        | 0.00185<br>+/- 0.00010     | 0.00202<br>+/- 0.00014 | 0.0938              | 0.00211<br>+/- 0.00067 | 0.00177<br>+/- 0.00015 | -0.1620           |
| Alanine        | 0.43414<br>+/- 0.02249     | 0.46583<br>+/- 0.02133 | 0.0729              | 0.80207<br>+/- 0.15560 | 0.74059<br>+/- 0.12156 | -0.0766           |
| Formate        | 0.13602<br>+/- 0.00943     | 0.14754<br>+/- 0.00695 | 0.0847              | 0.17317<br>+/- 0.01541 | 0.17122<br>+/- 0.00819 | -0.0112           |
| Fructose       | 0.53448<br>+/- 0.01883     | 0.48657<br>+/- 0.05708 | -0.0896             | 0.94188<br>+/- 0.17946 | 1.06769<br>+/- 0.23161 | 0.1335            |
| Glucose        | 4.24894<br>+/- 0.05585     | 3.85964<br>+/- 0.14193 | -0.0916             | 8.59852<br>+/- 1.98379 | 9.42809<br>+/- 2.50166 | 0.0964            |
| Lactate        | 1.90185<br>+/- 0.11360     | 2.54671<br>+/- 0.21269 | 0.3390              | 3.60643<br>+/- 0.81563 | 3.36272<br>+/- 0.53344 | -0.0675           |
| Pyruvate       | 0.00610<br>+/- 0.00176     | 0.01237<br>+/- 0.00167 | 1.0279              | 0.02052<br>+/- 0.00697 | 0.01863<br>+/- 0.00593 | -0.0918           |
| Sarcosine      | 0.00130<br>+/- 0.00030     | 0.00190<br>+/- 0.00020 | 0.4603              | 0.00329<br>+/- 0.00077 | 0.00197<br>+/- 0.00076 | -0.4001           |
| Taurine        | 0.09969<br>+/- 0.01804     | 0.10301<br>+/- 0.00526 | 0.0333              | 0.18446<br>+/- 0.04651 | 0.13862<br>+/- 0.03327 | -0.2485           |

**Supplementary Table 3. Mean ( $\pm$  SEM) urinary N excretion.**

|       | Normal (g)      | PCOS (g)        |
|-------|-----------------|-----------------|
| Day   | 5.86 $\pm$ 0.75 | 7.16 $\pm$ 1.07 |
| Night | 1.98 $\pm$ 0.21 | 2.54 $\pm$ 0.30 |

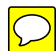Supplementary Table 4. Mean ( $\pm$  SEM)\* breath  $\delta^{13}\text{CO}_2$ .

|                       | Control ( $\delta$ , ‰) | PCOS ( $\delta$ , ‰) |
|-----------------------|-------------------------|----------------------|
| 06:00 (WAKE-UP)       | -23.1 $\pm$ 0.3         | -21.6 $\pm$ 0.3      |
| 07:40 (PRE-BREAKFAST) | -22.6 $\pm$ 0.3         | -21.9 $\pm$ 0.3      |
| POST-BREAKFAST        | -22.6 $\pm$ 0.3         | -21.9 $\pm$ 0.3      |
| 9:40                  | -21.9 $\pm$ 0.3         | -21.4 $\pm$ 0.3      |
| 12:00 (PRE-LUNCH)     | -20.9 $\pm$ 0.3         | -20.8 $\pm$ 0.3      |
| POST-LUNCH            | -21.1 $\pm$ 0.3         | -21.1 $\pm$ 0.3      |
| 14:00                 | -20.9 $\pm$ 0.3         | -21.1 $\pm$ 0.3      |
| 15:00                 | -20.6 $\pm$ 0.3         | -20.8 $\pm$ 0.3      |
| 18:00 (PRE-DINNER)    | -21.7 $\pm$ 0.3         | -21.8 $\pm$ 0.3      |
| POST-DINNER           | -22.0 $\pm$ 0.3         | -22.0 $\pm$ 0.3      |
| 20:00                 | -21.7 $\pm$ 0.3         | -21.7 $\pm$ 0.3      |

\*Least square means from repeated measures ANOVA.

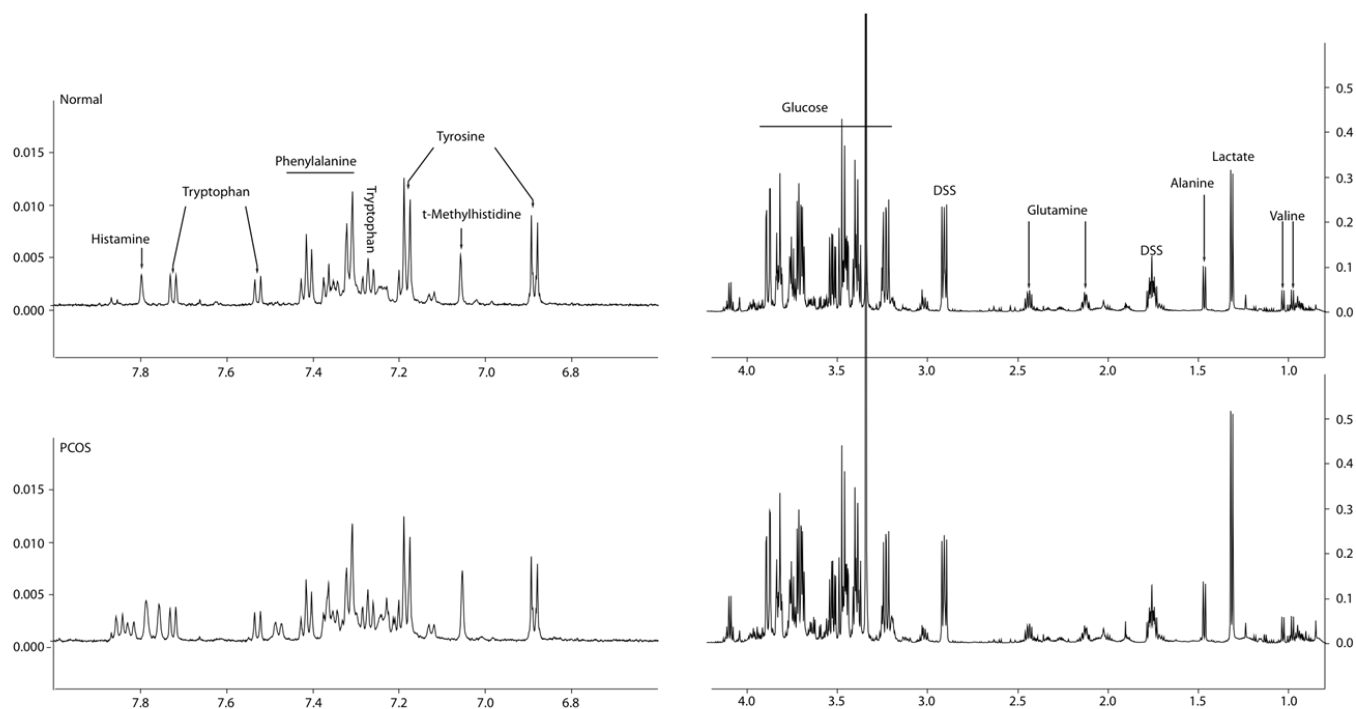

**Supplementary Fig. (1).** Representative 1D  $^1\text{H}$ -NMR spectra of fasting serum from a normal (upper panels) and a PCOS (lower panels) subject: right panels show the 0.85–4.15 ppm chemical shift region; left panels show the 6.60–8.00 ppm chemical shift region. Serum samples were collected from subjects after waking during an inpatient stay. Spectra were collected as 512 scans on Varian 800 MHz NMR spectrometer equipped with a cold probe. Chenomx NMR suite 6.1 was used to identify the metabolites.

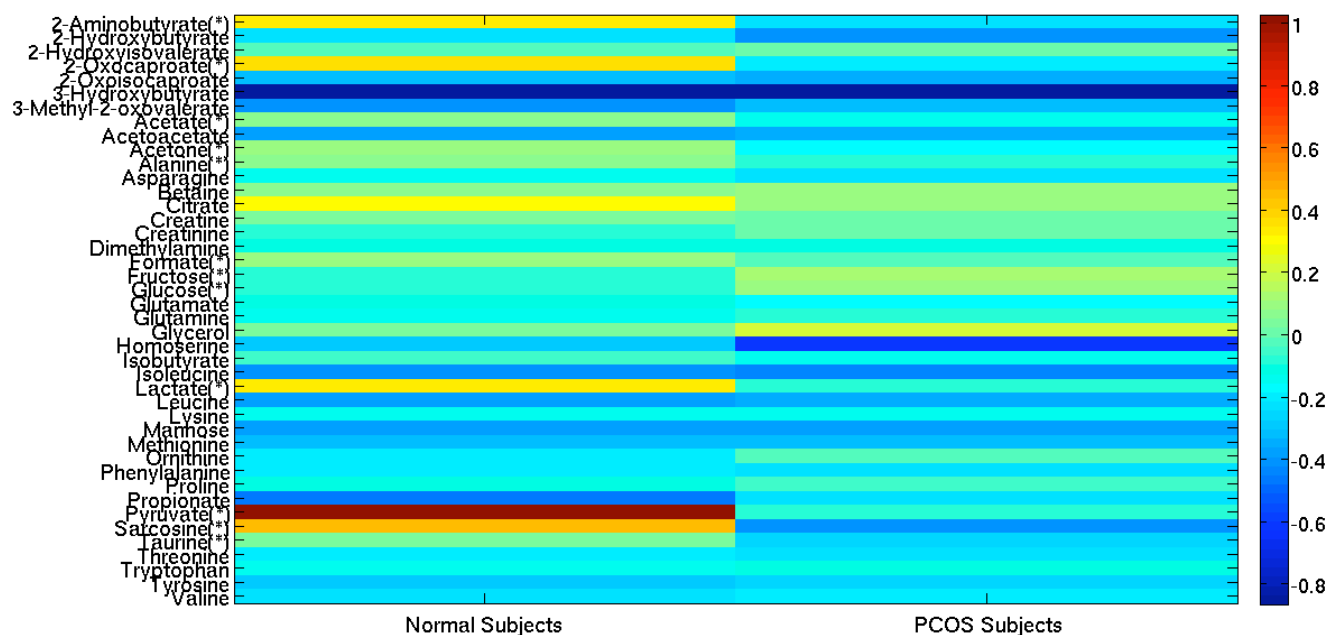

**Supplementary Fig. (2).** Heat map showing the fold changes between the fasting and 2hOGTT conditions for the normal and PCOS subjects. Metabolites labeled with (\*) are ones that change in opposite directions in normal and PCOS subjects; with exception of glucose and fructose, these metabolites increase from fasting to 2hOGTT in the normal subjects and decrease from fasting to 2hOGTT in the PCOS subjects. The color index at the right of the figure provides a key to the fold change. Those metabolites that show trends toward significant increase are: acetoacetate ( $P = 0.079$ ), acetate ( $P = 0.06$ ), 2-amino butyrate ( $P = 0.055$ ), and sarcosine ( $P = 0.06$ ).
